# Supplementary material for: Carbon Nanotubes Interconnected NiCo Layered Double Hydroxide Rhombic Dodecahedral Nanocages for Efficient Oxygen Evolution Reaction
Source: MDPI journal article supplement (doi:10.3390/nano12061015), 2022-03-20
Supplement: s1 [file s1]

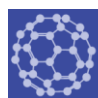

## Article

# Carbon Nanotubes Interconnected NiCo Layered Double Hydroxide Rhombic Dodecahedral Nanocages for Efficient Oxygen Evolution Reaction

Meng Li <sup>1,2,†</sup>, Yujie Huang <sup>2,†</sup>, Jiaqi Lin <sup>2</sup>, Meize Li <sup>2</sup>, Mengqi Jiang <sup>2</sup>, Linfei Ding <sup>3</sup>, Dongmei Sun <sup>2</sup>, Kai Huang <sup>1,\*</sup> and Yawen Tang <sup>2,\*</sup>

<sup>1</sup> School of Chemistry and Chemical Engineering, Southeast University, Nanjing 211189, China; limeng374@163.com

<sup>2</sup> Jiangsu Key Laboratory of New Power Batteries, Jiangsu Collaborative Innovation Centre of Biomedical Functional Materials, School of Chemistry and Materials Science, Nanjing Normal University, Nanjing 210023, China; huangyj0206@163.com (Y.H.); linjq0215@163.com (J.L.); meitselee@163.com (M.L.); jiangmengqi666@163.com (M.J.); sundongmei@njnu.edu.cn (D.S.)

<sup>3</sup> Advanced Analysis and Testing Center, Nanjing Forestry University, Nanjing 210037, China; jsdinglinfei@163.com

\* Correspondence: huangk@seu.edu.cn (K.H.); tangyawen@njnu.edu.cn (Y.T.)

† These authors contributed equally to this work.

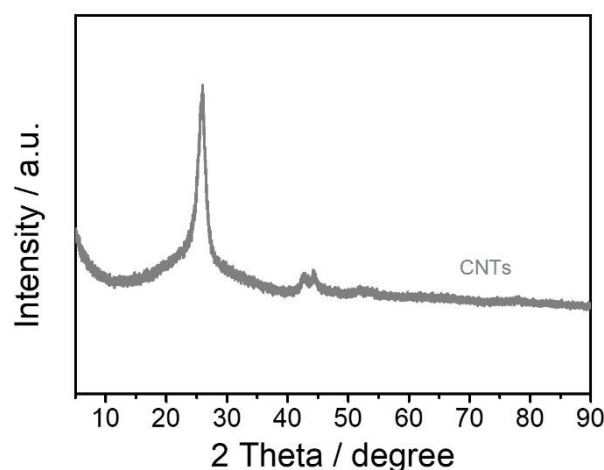

Figure S1. XRD pattern of CNTs.

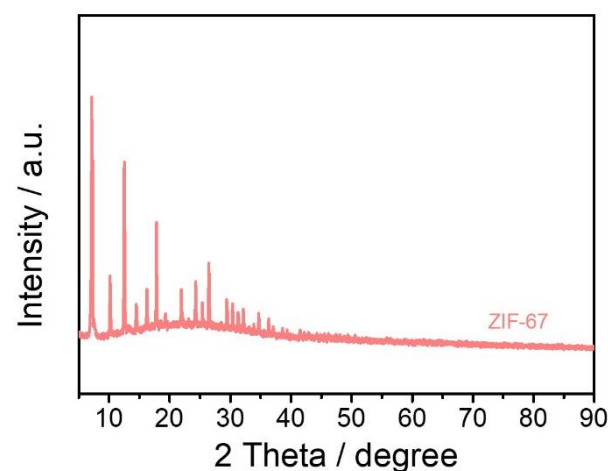

Figure S2. XRD pattern of ZIF-67.

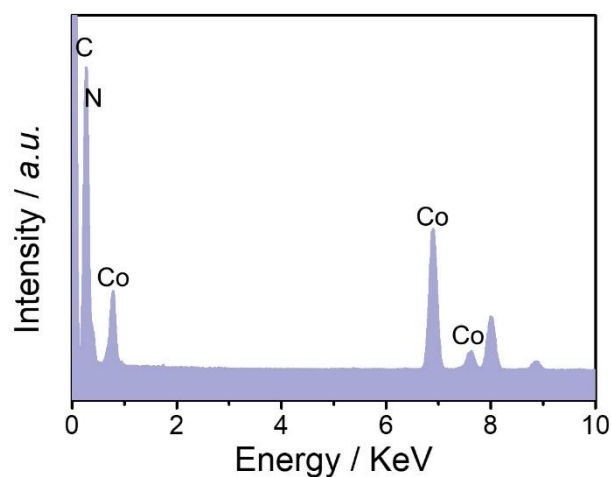

Figure S3. EDS spectrum of ZIF-67@CNTs.

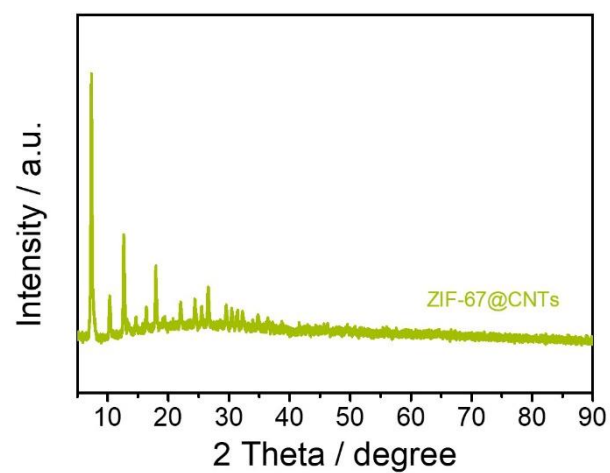

Figure S4. XRD pattern of ZIF-67@CNTs.

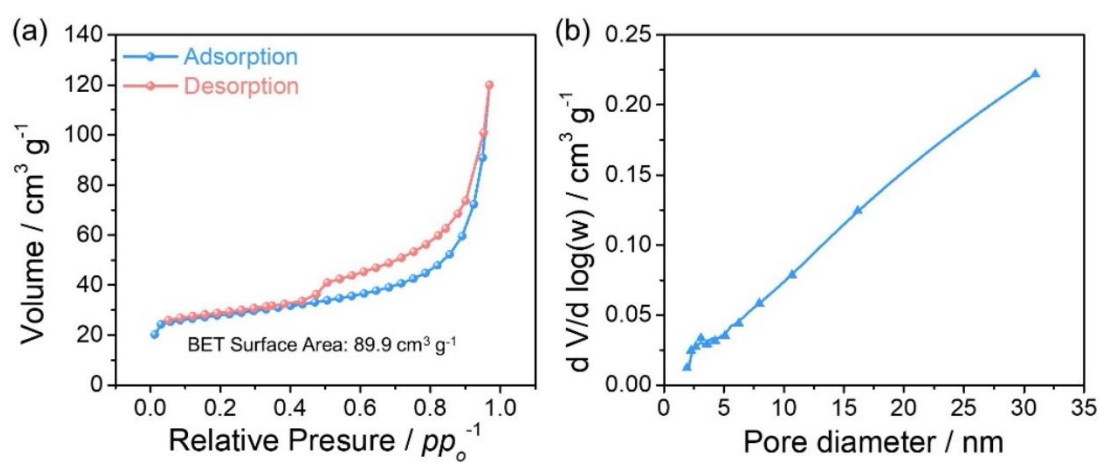

Figure S5. (a) N<sub>2</sub> adsorption-desorption isotherms and (b) corresponding pore size distribution curve of NiCo-LDH RDC@CNTs.

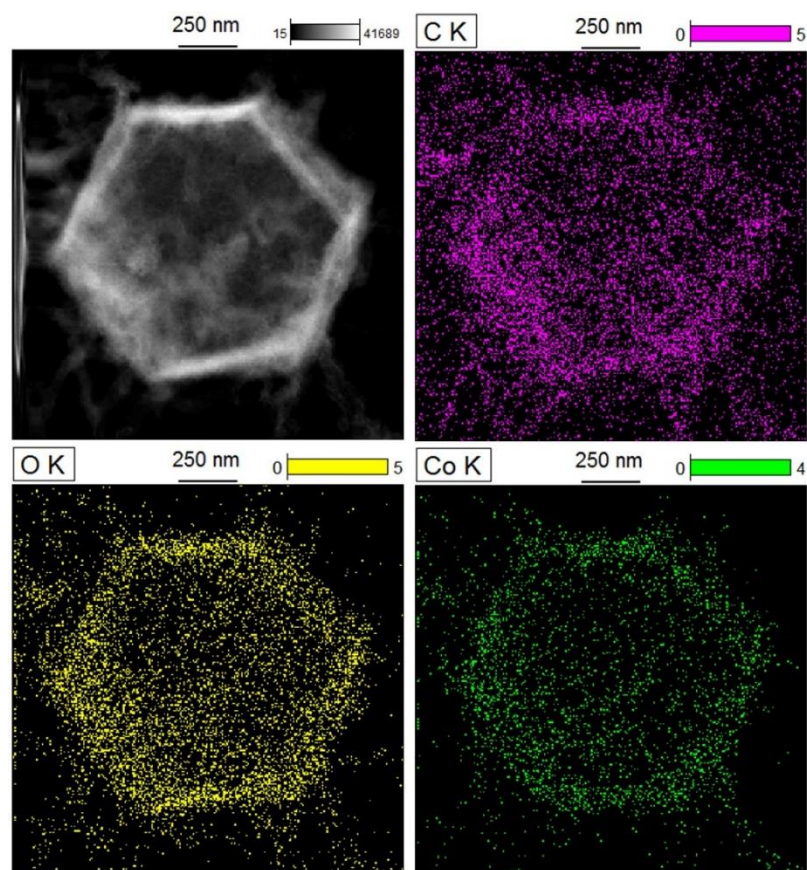

**Figure S6.** HADDF-STEM image and corresponding EDS elements mapping profiles of NiCo-LDH RDC@CNTs.

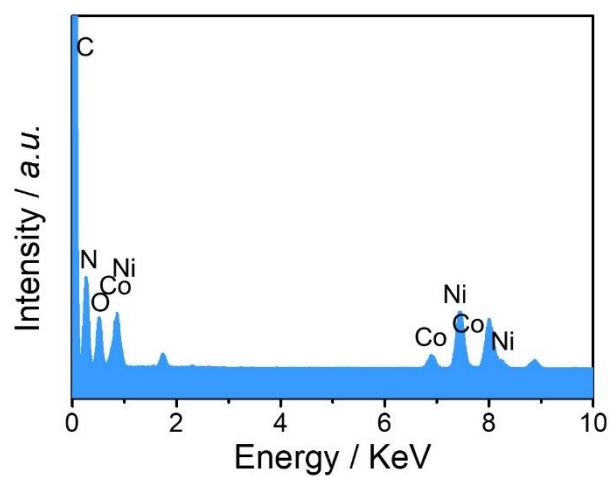

**Figure S7.** EDS spectrum of NiCo-LDH RDC@CNTs.

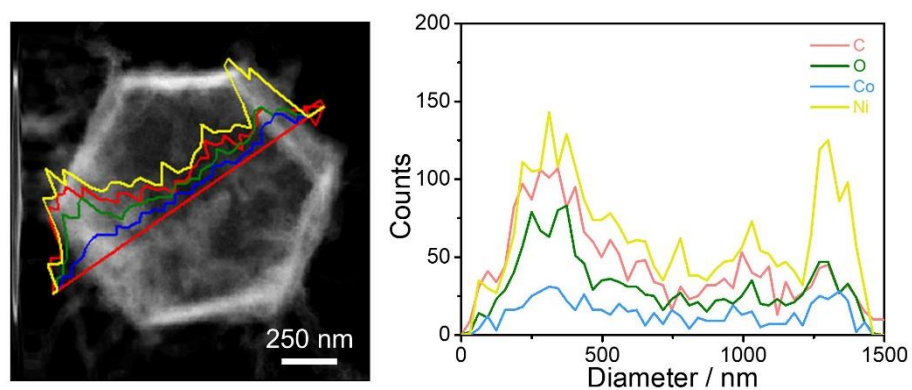

**Figure S8.** HADDF-STEM image and corresponding EDS linescan profiles of NiCo-LDH RDC@CNTs.

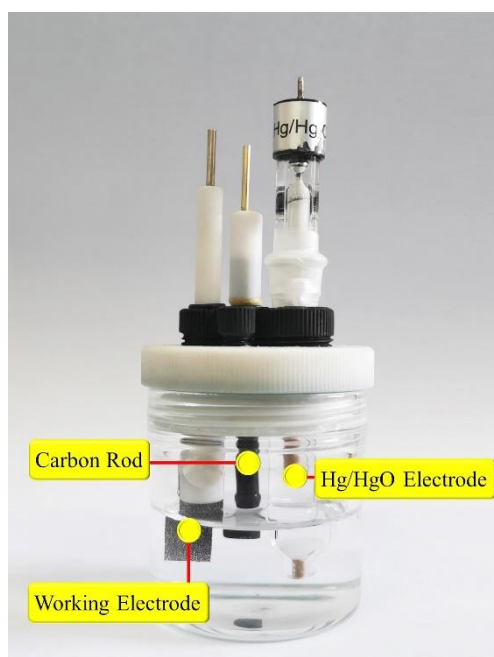

**Figure S9.** Digital image of OER electrolyzer.

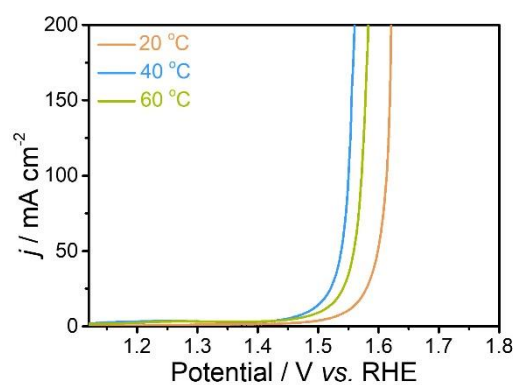

**Figure S10.** The OER polarization curves of NiCo-LDH RDC@CNTs samples with different reaction temperature (20 °C, 40 °C and 60 °C).

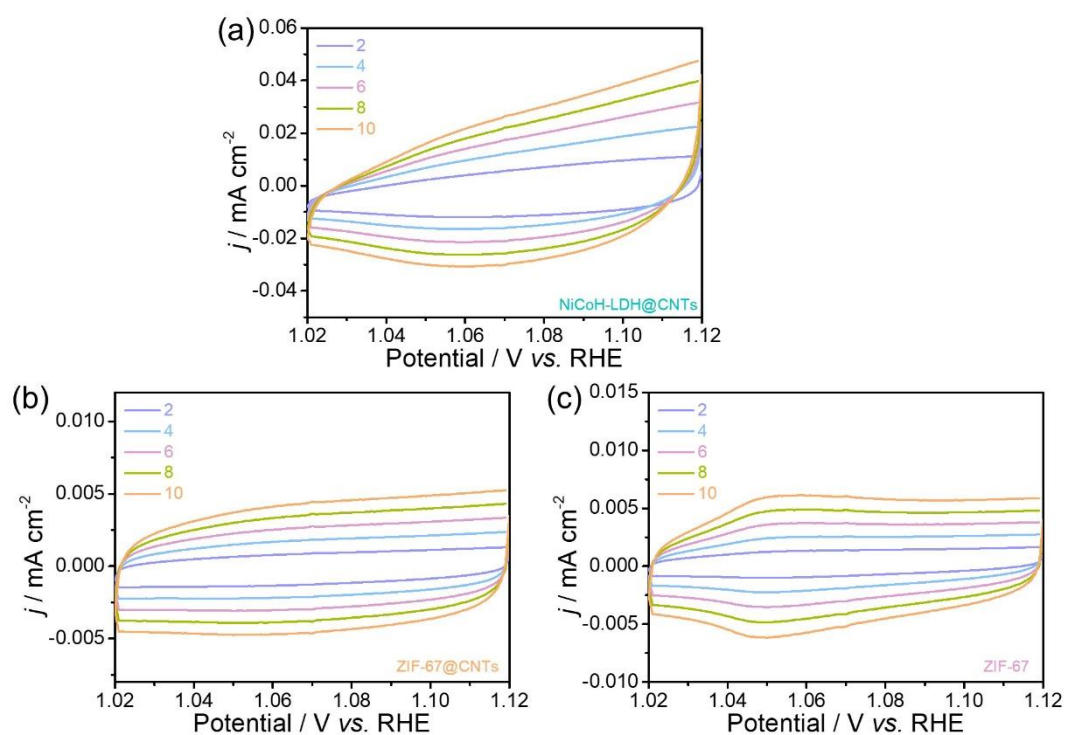

**Figure S11.** CVs at different sweeping rates from 2  $\text{mV s}^{-1}$  to 10  $\text{mV s}^{-1}$  of (a) NiCo-LDH RDC@CNTs, (b) ZIF-67@CNTs, (c) ZIF-67.

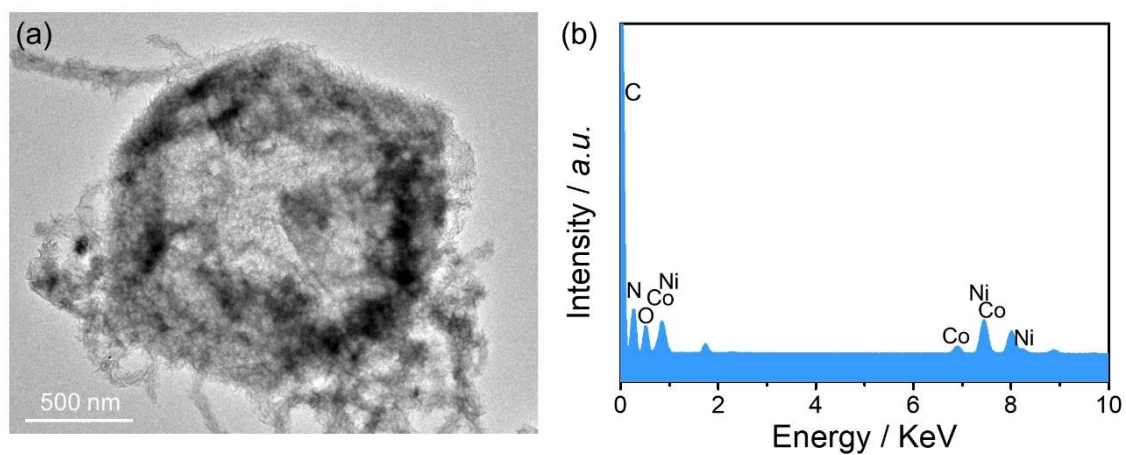

**Figure S12.** (a) TEM image and (b) EDS profile of recovered NiCo-LDH RDC@CNTs after stability test.

**Table S1.** Comparison of OER activity of NiCo-LDH RDC@CNTs with other catalysts reported.

| Catalysts                                 | $\eta_j$ / mV at<br>10 mA cm <sup>-2</sup> | Tafel slope /<br>mV dec <sup>-1</sup> | Reference                                     |
|-------------------------------------------|--------------------------------------------|---------------------------------------|-----------------------------------------------|
| NiCo-LDH RDC@CNTs                         | 255                                        | 78.23                                 | This Work                                     |
| M-Co <sub>3</sub> O <sub>4</sub> /NPC     | 302                                        | 83                                    | Nano-Micro Lett. (2018) 10:15                 |
| GNiPy350N                                 | 320                                        | 136                                   | J. Mater. Chem. A, 2021, 9,<br>11255 – 11267  |
| CuCo <sub>2</sub> S <sub>4</sub>          | 310                                        | 86                                    | ACS Catal. 2017, 7, 5871.                     |
| graphene@NiCo <sub>2</sub> S <sub>4</sub> | 264                                        | 80.3                                  | J. Mater. Chem. A 2018, 6,<br>8109            |
| A-CoS <sub>4.6</sub> O <sub>0.6</sub>     | 290                                        | 67                                    | Angew. Chem. Int. Ed. 2017,<br>56, 4858- 4861 |
| Co <sub>3</sub> S <sub>4</sub>            | 360                                        | 90                                    | ACS Nano. 2014, 8, 10909-<br>10919            |
| FeOOH@Ni(OH) <sub>2</sub>                 | 310                                        | 70                                    | Electrochim. Acta 2019, 301,<br>258-266       |
| CeO <sub>x</sub> /CoO <sub>x</sub>        | 313                                        | 66                                    | ACS Catal. 2018, 8, 5, 4257 –<br>4265         |
| NiCoP/C                                   | 330                                        | 96                                    | Angew. Chem. Int. Ed. 2017,<br>56, 3897-3900  |
| Co <sub>9</sub> S <sub>8</sub> /NSC-900   | 410                                        | 99                                    | NPG Asia Mater. (2018) 10:<br>670-684         |
| CoZn-NC-700                               | 390                                        | 69                                    | Adv. Funct. Mater. 2017, 27,<br>1700795       |
